# Supplementary material for: Versatile catalytic systems based on complexes of zinc, magnesium and calcium supported by a bulky bis(morpholinomethyl)phenoxy ligand for the large-scale immortal ring-opening polymerisation of cyclic esters
Source: Royal Society of Chemistry journal article supplement (doi:10.1039/b917799j), 2009-01-01
Supplement: b917799j.pdf [file b917799j.pdf]

(Electronic Supporting Information)

# Versatile Catalytic Systems Based on Complexes of Zinc, Magnesium and Calcium Supported by a Bulky Bis(Morpholinomethyl)Phenoxy Ligand for the Large-Scale Immortal Ring-Opening Polymerisation of Cyclic Esters

Valentin Poirier, Thierry Roisnel, Jean-François Carpentier\* and Yann Sarazin\*

*Catalysis and Organometallics, UMR CNRS 6226 – Université de Rennes 1, 35042 Rennes Cedex France.*

*E-mail: [jean-francois.carpentier@univ-rennes1.fr](mailto:jean-francois.carpentier@univ-rennes1.fr), [yann.sarazin@univ-rennes1.fr](mailto:yann.sarazin@univ-rennes1.fr).*

*Fax : +33 2 232 369 39 ; Tel : + 33 2 232 359 50 ; +33 2 232 330 19*

## Contents

**Table S1:** Complete table of polymerisation data for experiments performed with zinc initiators.

**Figure S1:** <sup>1</sup>H NMR spectrum of a low molecular weight PLLA prepared with L-LA/2<sup>i</sup>PrOH in relative amounts of 500/1/25 (500.13 MHz, CDCl<sub>3</sub>, 25 °C, 64 scans, D1 = 0.50 sec).

**Figure S2:** MALDI-TOF mass spectrum (main population: Na<sup>+</sup>; minor population: K<sup>+</sup>) of a low molecular weight PLLA having a number average molecular weight  $\overline{Mn}_{SEC}$  of 4 600 g·mol<sup>-1</sup>, prepared with L-LA/1<sup>i</sup>PrOH in relative amounts of 5 000/1/100 (71% conversion).

**Figure S3:** MALDI-TOF mass spectrum (main population: Na<sup>+</sup>; minor population: K<sup>+</sup>) of a low molecular weight PLLA having a number average molecular weight  $\overline{Mn}_{SEC}$  of 3 000 g·mol<sup>-1</sup>, prepared with L-LA/2<sup>i</sup>PrOH in relative amounts of 500/1/25 (86% conversion).

**Figure S4:** <sup>1</sup>H NMR spectrum of a low molecular weight PLLA prepared with L-LA/3<sup>i</sup>PrOH in relative amounts of 100/1/10 (500.13 MHz, CDCl<sub>3</sub>, 25 °C, 16 scans, D1 = 0.50 sec).

**Figure S5:** MALDI-TOF mass spectrum (main population: Na<sup>+</sup>; minor population: K<sup>+</sup>) of a low molecular weight PLLA having a number average molecular weight  $\overline{Mn}_{SEC}$  of 4 700 g·mol<sup>-1</sup>, prepared with L-LA/3<sup>i</sup>PrOH in relative amounts of 1 000/1/10 with a 20% conversion.

**Table S1.** Polymerisation data using zinc complexes (ZnEt<sub>2</sub>, **3** or **4**) / ROH binary catalytic systems.<sup>a</sup>

| Entry           | Monomer        | Initiator           | ROH               | [M] <sub>0</sub> /[Zn] <sub>0</sub> /[ROH] <sub>0</sub> | [M] <sub>0</sub><br>(mol·L <sup>-1</sup> ) | Time<br>(h) | Yield <sup>b</sup><br>(%) | TOF <sup>c</sup><br>(h <sup>-1</sup> ) | M <sub>n,calc</sub> <sup>d</sup><br>(g·mol <sup>-1</sup> ) | M <sub>n,SEC</sub> <sup>e</sup><br>(g·mol <sup>-1</sup> ) | M <sub>w</sub> /M <sub>n</sub> <sup>e</sup> | P <sub>r</sub> <sup>f</sup> |
|-----------------|----------------|---------------------|-------------------|---------------------------------------------------------|--------------------------------------------|-------------|---------------------------|----------------------------------------|------------------------------------------------------------|-----------------------------------------------------------|---------------------------------------------|-----------------------------|
| 1               | L-LA           | [LO <sup>1</sup> ]H | <sup>i</sup> PrOH | 1 000/-/10                                              | 2.0                                        | 1           | 0                         | 0                                      | N/A                                                        | N/A                                                       | N/A                                         |                             |
| 2               | L-LA           | <b>3</b>            | <sup>i</sup> PrOH | 1 000/1/0                                               | 2.0                                        | 1           | 18                        | 180                                    | 26 000                                                     | 10 300                                                    | 2.24                                        |                             |
| 3               | L-LA           | <b>3</b>            | <sup>i</sup> PrOH | 1 000/1/10                                              | 2.0                                        | 1           | 97                        | 970                                    | 14 000                                                     | 15 100                                                    | 1.10                                        | 1.00                        |
| 4               | L-LA           | <b>3</b>            | <sup>i</sup> PrOH | 5 000/1/25                                              | 4.0                                        | 1           | 71                        | 3 550                                  | 20 500                                                     | 20 600                                                    | 1.09                                        |                             |
| 5               | L-LA           | <b>3</b>            | <sup>i</sup> PrOH | 5 000/1/25                                              | 4.0                                        | 1.5         | 94                        | 3 130                                  | 27 100                                                     | 26 200                                                    | 1.16                                        |                             |
| 6               | L-LA           | ZnEt <sub>2</sub>   | <sup>i</sup> PrOH | 20 000/1/250                                            | 6.0                                        | 1.33        | 11                        | 1 650                                  | 1 300                                                      | 1 600                                                     | 1.09                                        |                             |
| 7               | L-LA           | <b>4</b>            | <sup>i</sup> PrOH | 20 000/1/250                                            | 6.0                                        | 1.33        | 65                        | 9 770                                  | 7 500                                                      | 6 700                                                     | 1.10                                        |                             |
| 8               | L-LA           | <b>3</b>            | <sup>i</sup> PrOH | 20 000/1/250                                            | 6.0                                        | 1.33        | 74                        | 11 130                                 | 8 600                                                      | 8 900                                                     | 1.16                                        |                             |
| 9               | L-LA           | <b>3</b>            | <sup>i</sup> PrOH | 20 000/1/100                                            | 6.0                                        | 3           | 95                        | 6 330                                  | 27 400                                                     | 26 800                                                    | 1.28                                        |                             |
| 10              | L-LA           | <b>3</b>            | <sup>i</sup> PrOH | 20 000/1/175                                            | 6.0                                        | 3           | 98                        | 6 530                                  | 16 200                                                     | 16 100                                                    | 1.20                                        |                             |
| 11              | L-LA           | <b>3</b>            | <sup>i</sup> PrOH | 20 000/1/250                                            | 6.0                                        | 3           | 98                        | 6 530                                  | 11 300                                                     | 11 600                                                    | 1.26                                        |                             |
| 12              | L-LA           | <b>3</b>            | <sup>i</sup> PrOH | 20 000/1/500                                            | 6.0                                        | 3           | 97                        | 6 470                                  | 5 600                                                      | 5 400                                                     | 1.32                                        |                             |
| 13              | L-LA           | <b>3</b>            | <sup>i</sup> PrOH | 20 000/1/750                                            | 6.0                                        | 3           | 94                        | 6 270                                  | 3 600                                                      | 3 000                                                     | 1.46                                        |                             |
| 14              | L-LA           | <b>3</b>            | <sup>i</sup> PrOH | 20 000/1/1 000                                          | 6.0                                        | 3           | 99                        | 6 600                                  | 2 900                                                      | 2 400                                                     | 1.33                                        | 1.00                        |
| 15              | L-LA           | <b>3</b>            | <sup>i</sup> PrOH | 50 000/1/500                                            | 6.0                                        | 16          | 100                       | 3 125                                  | 14 500                                                     | 13 500                                                    | 1.60                                        |                             |
| 16              | <i>rac</i> -LA | <b>3</b>            | <sup>i</sup> PrOH | 1 000/1/10                                              | 2.0                                        | 1           | 95                        | 950                                    | 14 000                                                     | 13 000                                                    | 1.10                                        | 0.50                        |
| 17 <sup>g</sup> | <i>rac</i> -LA | <b>3</b>            | <sup>i</sup> PrOH | 1 000/1/10                                              | 2.0                                        | 1           | 68                        | 680                                    | 13 000                                                     | 12 700                                                    | 1.19                                        | 0.45                        |
| 18              | BBL            | <b>3</b>            | <sup>i</sup> PrOH | 500/1/10                                                | Bulk                                       | 3           | 95                        | 158                                    | 4 100                                                      | 4 300                                                     | 1.07                                        | 0.50                        |

<sup>a</sup> Polymerisations performed in toluene at 60 °C. <sup>b</sup> Isolated yield of polymer. <sup>c</sup> Non-optimized turnover frequency (mol(L-LA)·mol(Zn)<sup>-1</sup>·h<sup>-1</sup>) calculated over the whole reaction time. <sup>d</sup> Calculated from [L-LA]<sub>0</sub>/[<sup>i</sup>PrOH]<sub>0</sub> × monomer conversion × M<sub>L-LA</sub> + M<sub><sup>i</sup>PrOH</sub>, with M<sub>L-LA</sub> = 144 g·mol<sup>-1</sup> and M<sub><sup>i</sup>PrOH</sub> = 60 g·mol<sup>-1</sup>. <sup>e</sup> Determined by size exclusion chromatography vs. polystyrene standards and corrected by a factor of 0.58. <sup>f</sup> Probability of a *meso* linkage between two repetitive units as determined by examination of the methine region of the <sup>1</sup>H homonuclear decoupled NMR spectrum of the polymers. <sup>g</sup> Polymerisation carried out in THF.

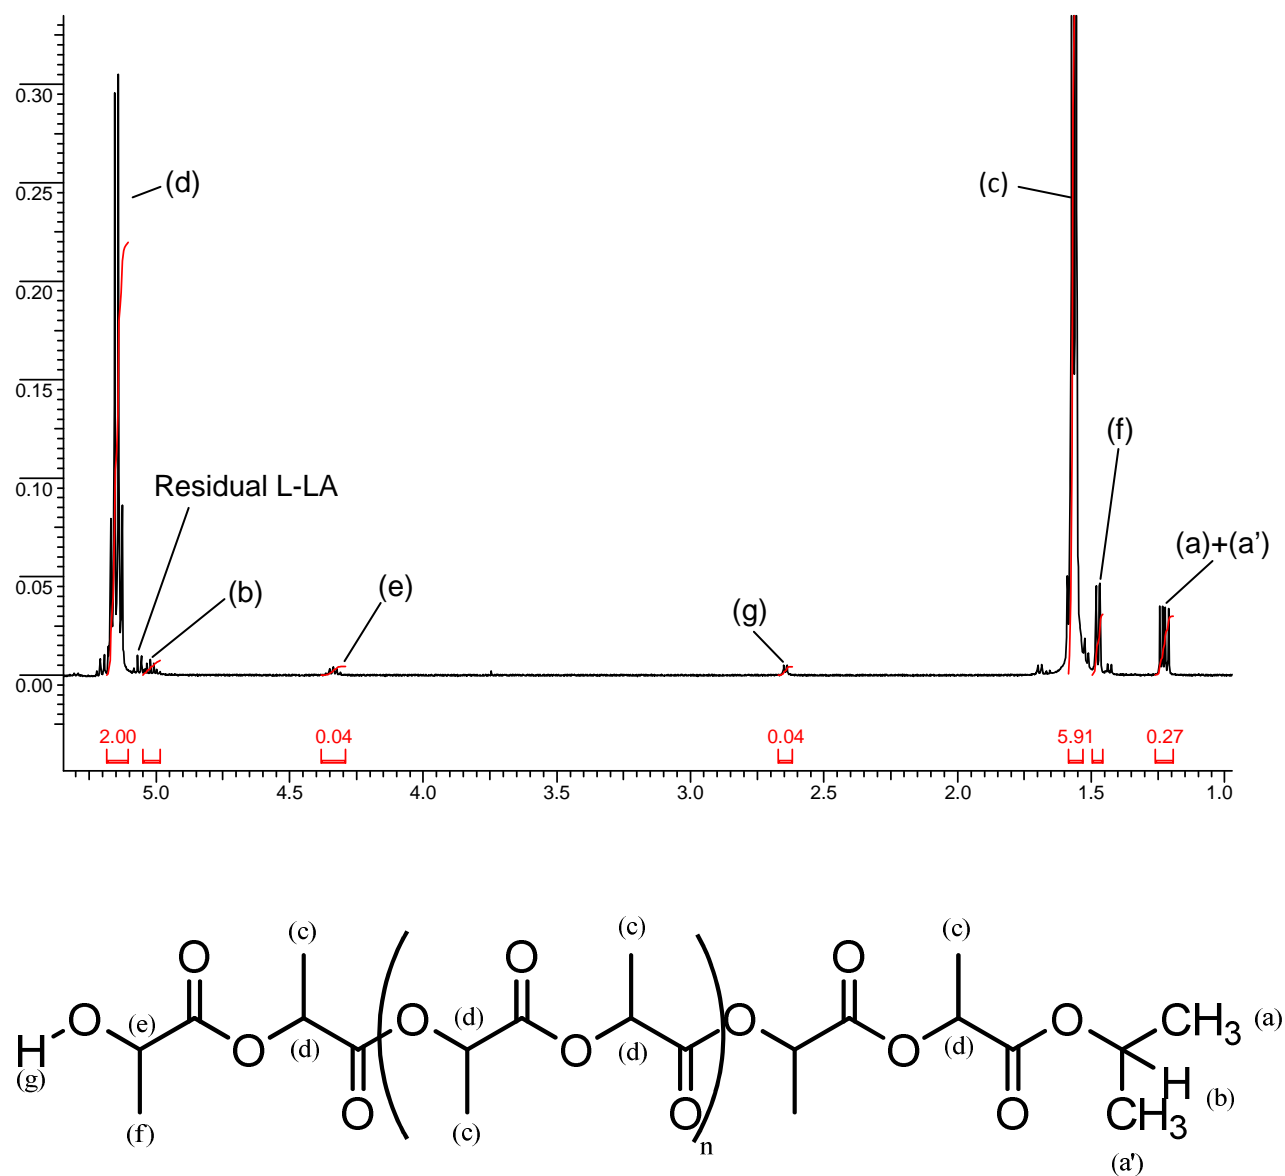

**Figure S1:** <sup>1</sup>H NMR spectrum of a low molecular weight PLLA prepared with L-LA/2<sup>i</sup>PrOH in relative amounts of 500/1/25 (500.13 MHz, CDCl<sub>3</sub>, 25 °C, 64 scans, D1 = 0.50 sec).

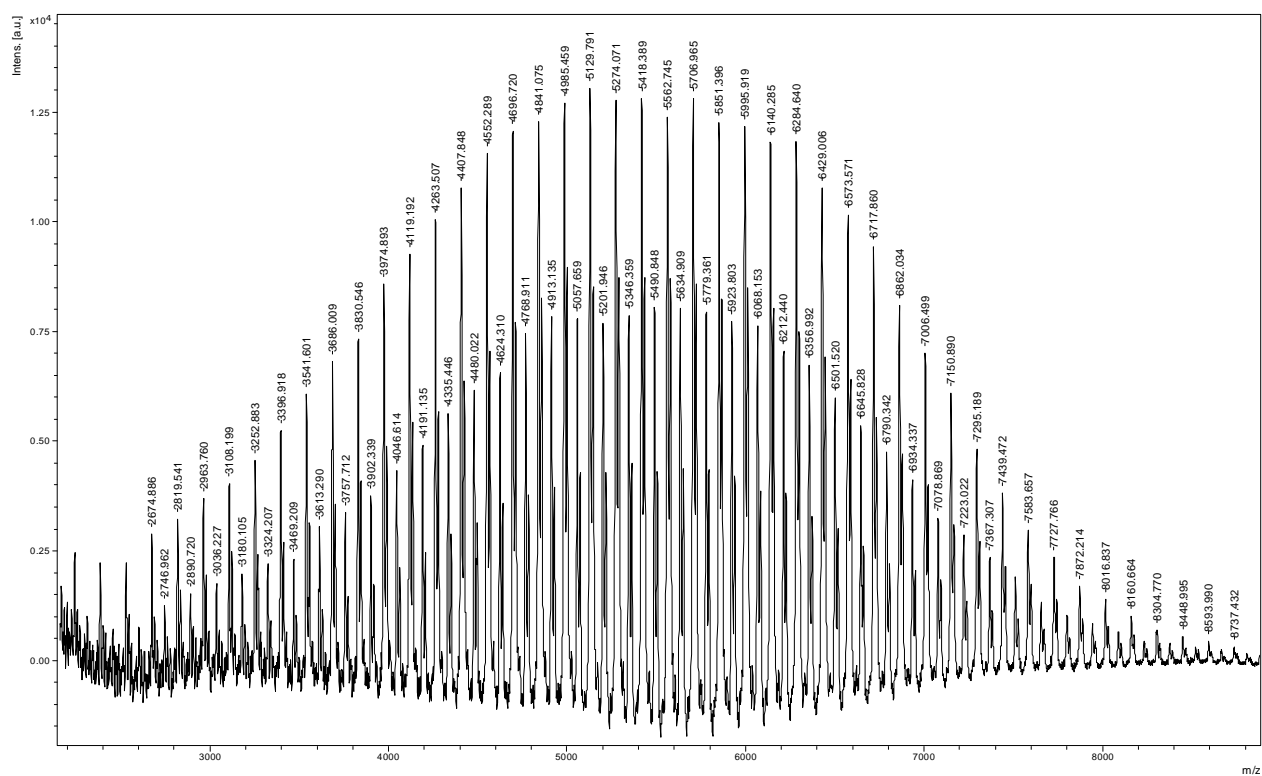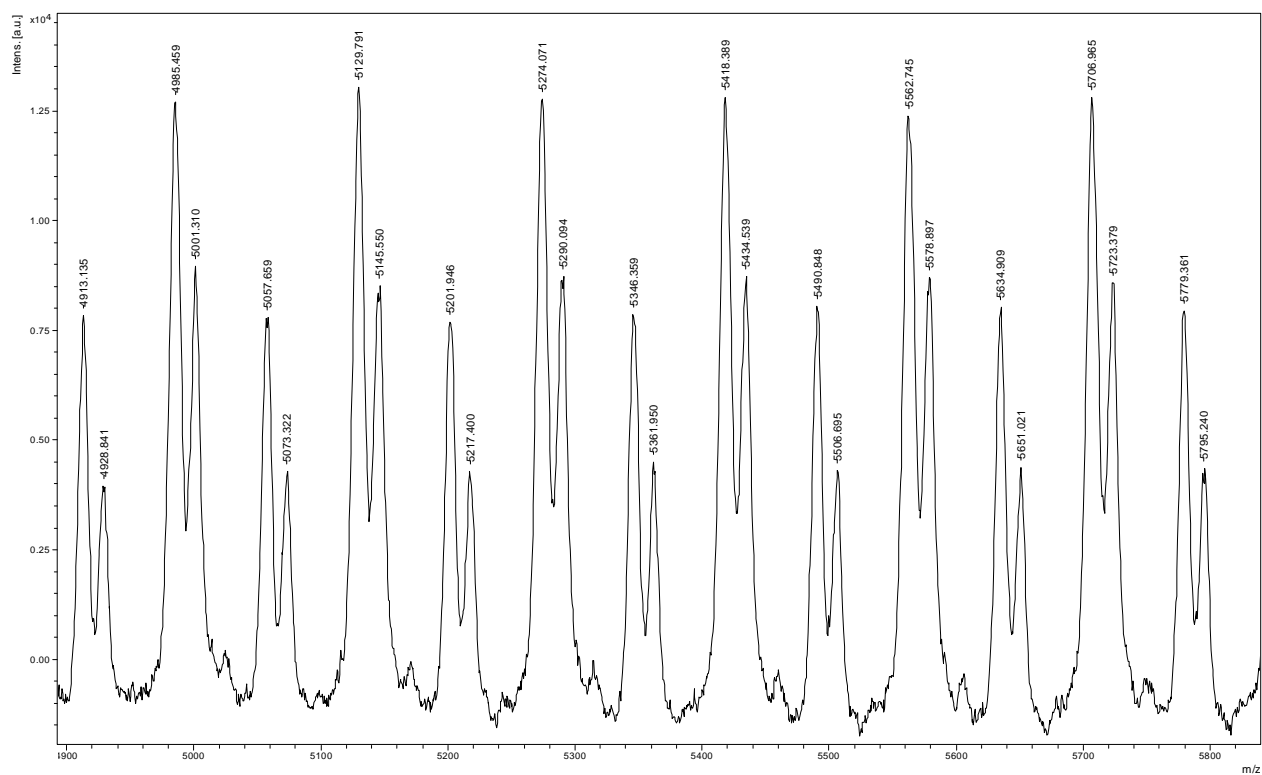

**Figure S2:** MALDI-TOF mass spectrum (main population:  $\text{Na}^+$ ; minor population:  $\text{K}^+$ ) of a low molecular weight PLLA having a number average molecular weight  $\overline{Mn}_{\text{SEC}}$  of  $4\,600\text{ g}\cdot\text{mol}^{-1}$ , prepared with L-LA/1<sup>h</sup>PrOH in relative amounts of 5 000/1/100 (71% conversion).

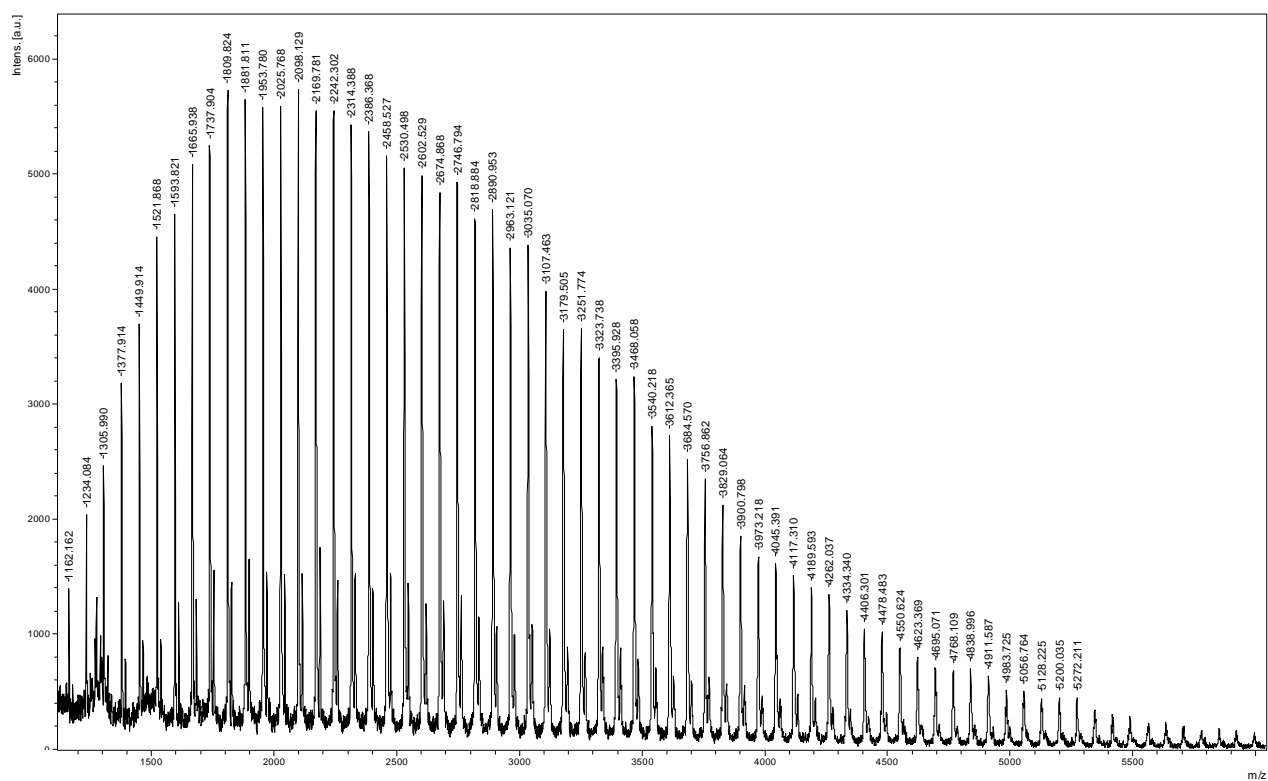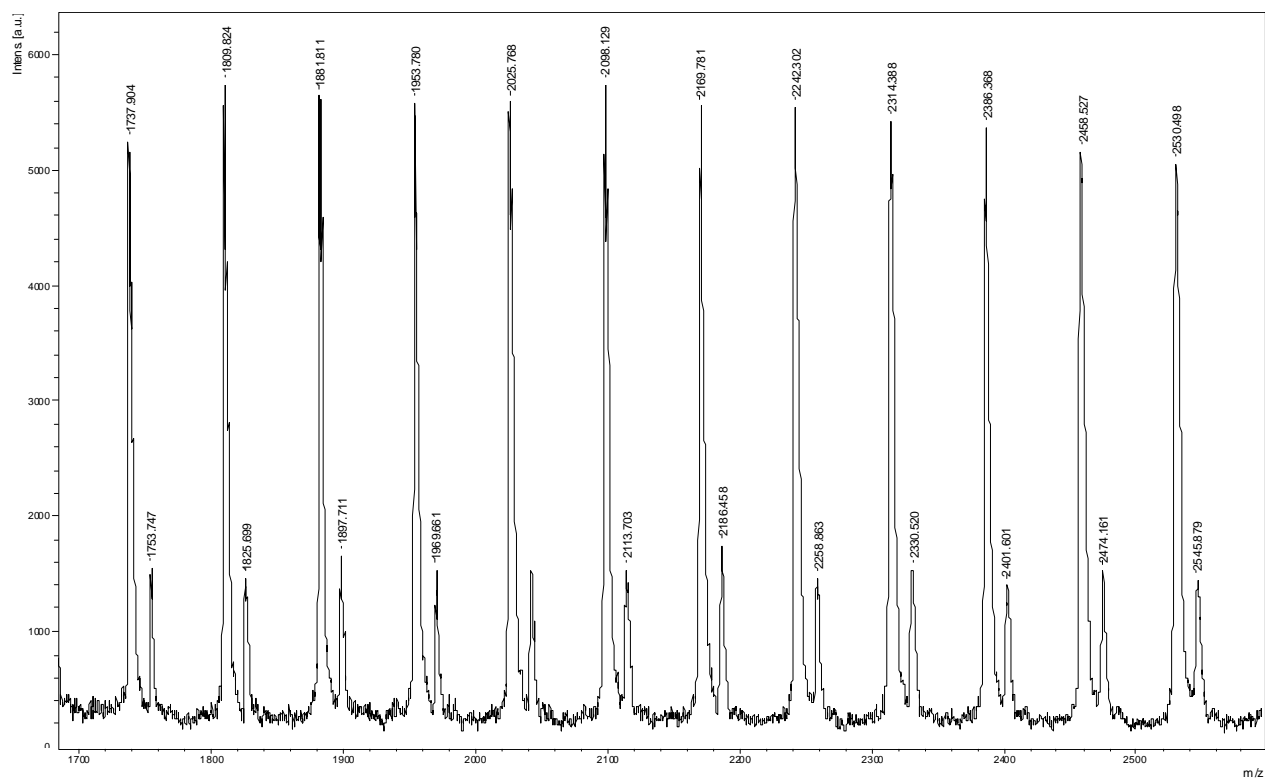

**Figure S3:** MALDI-TOF mass spectrum (main population: Na<sup>+</sup>; minor population: K<sup>+</sup>) of a low molecular weight PLLA having a number average molecular weight  $\overline{Mn}_{SEC}$  of 3 000 g·mol<sup>-1</sup>, prepared with L-LA/2<sup>i</sup>PrOH in relative amounts of 500/1/25 (86% conversion).

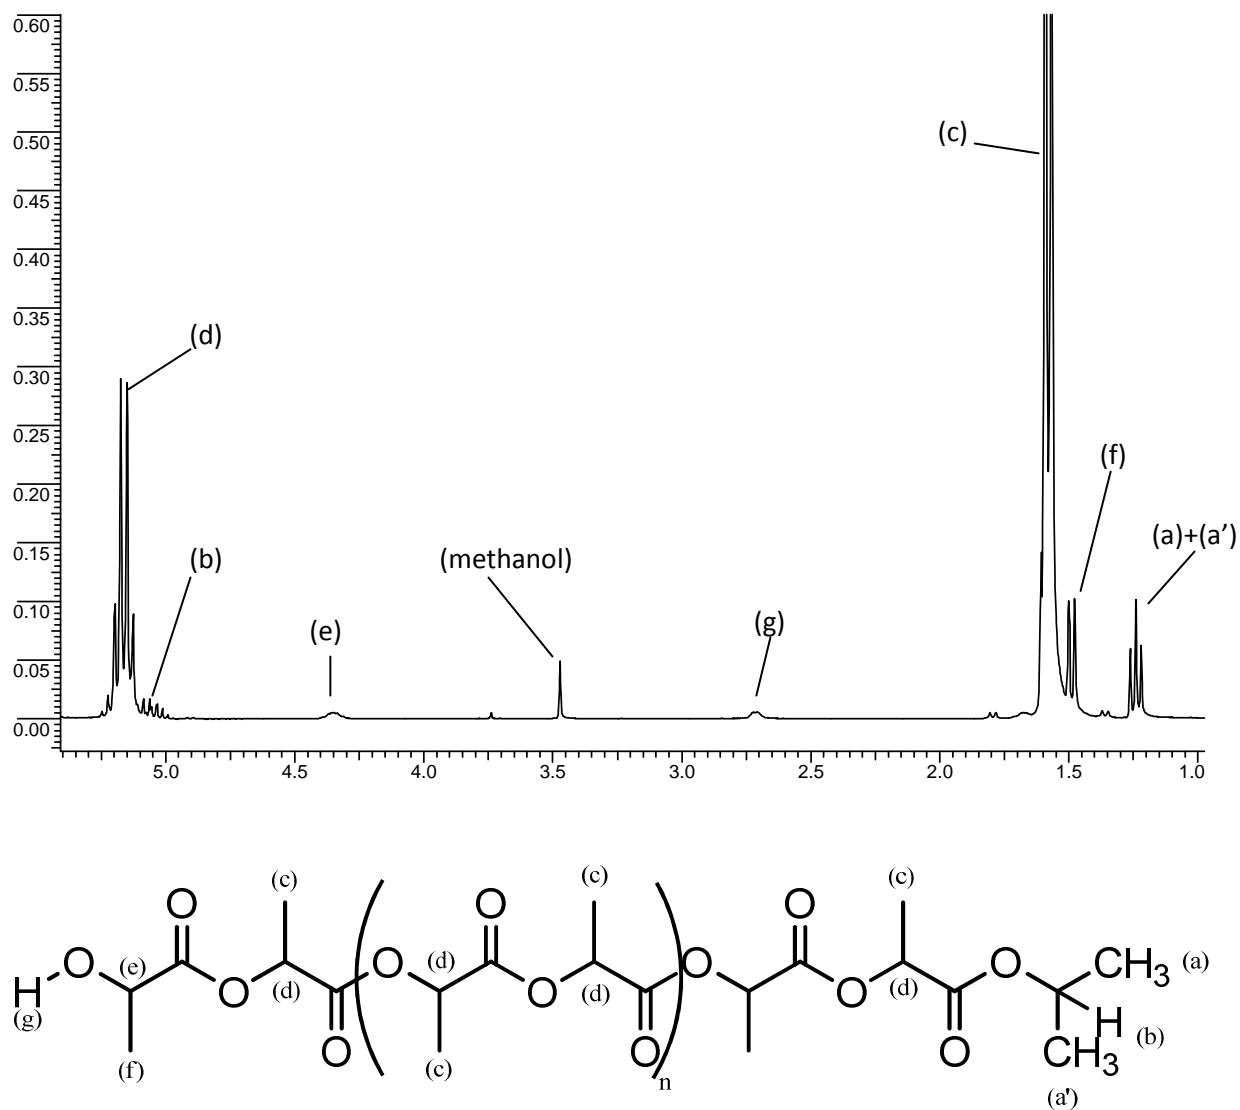

**Figure S4:**  $^1\text{H}$  NMR spectrum of a low molecular weight PLLA prepared with L-LA/3/ $^i$ PrOH in relative amounts of 100/1/10 (500.13 MHz,  $\text{CDCl}_3$ , 25  $^\circ\text{C}$ , 16 scans,  $D1 = 0.50$  sec).

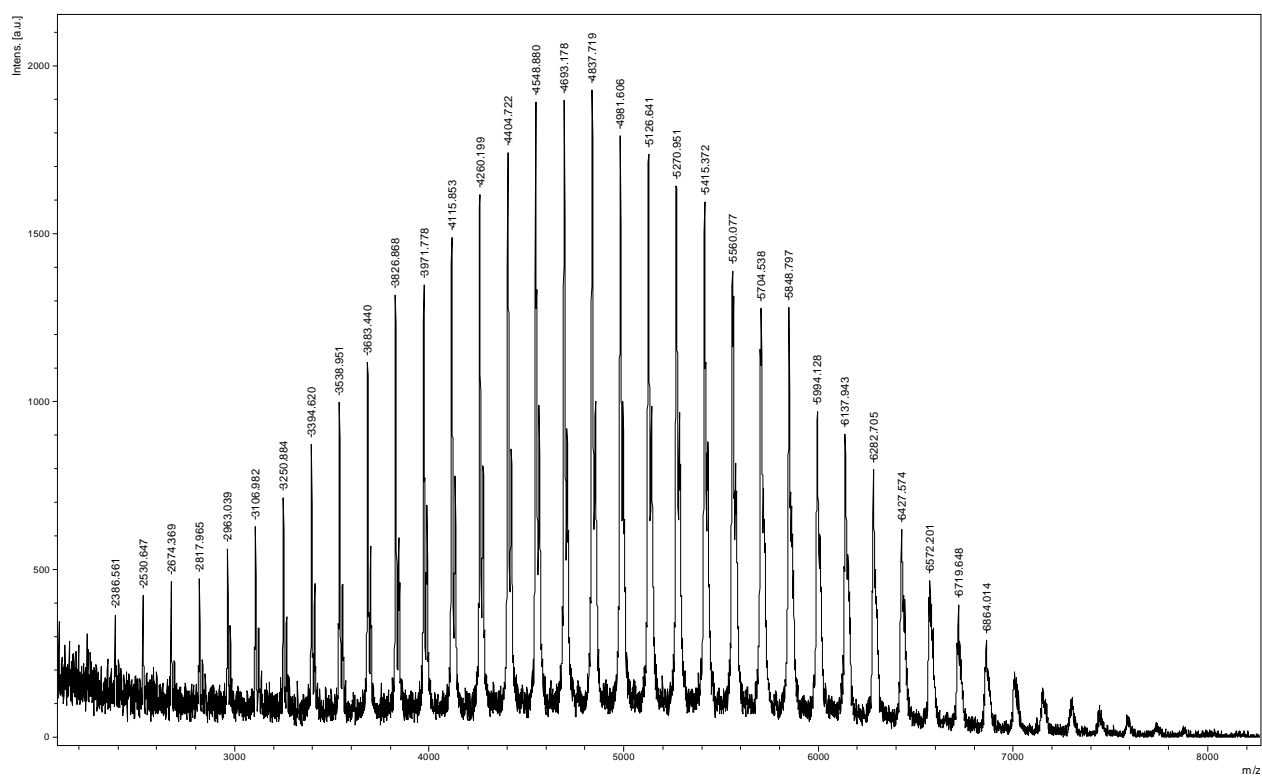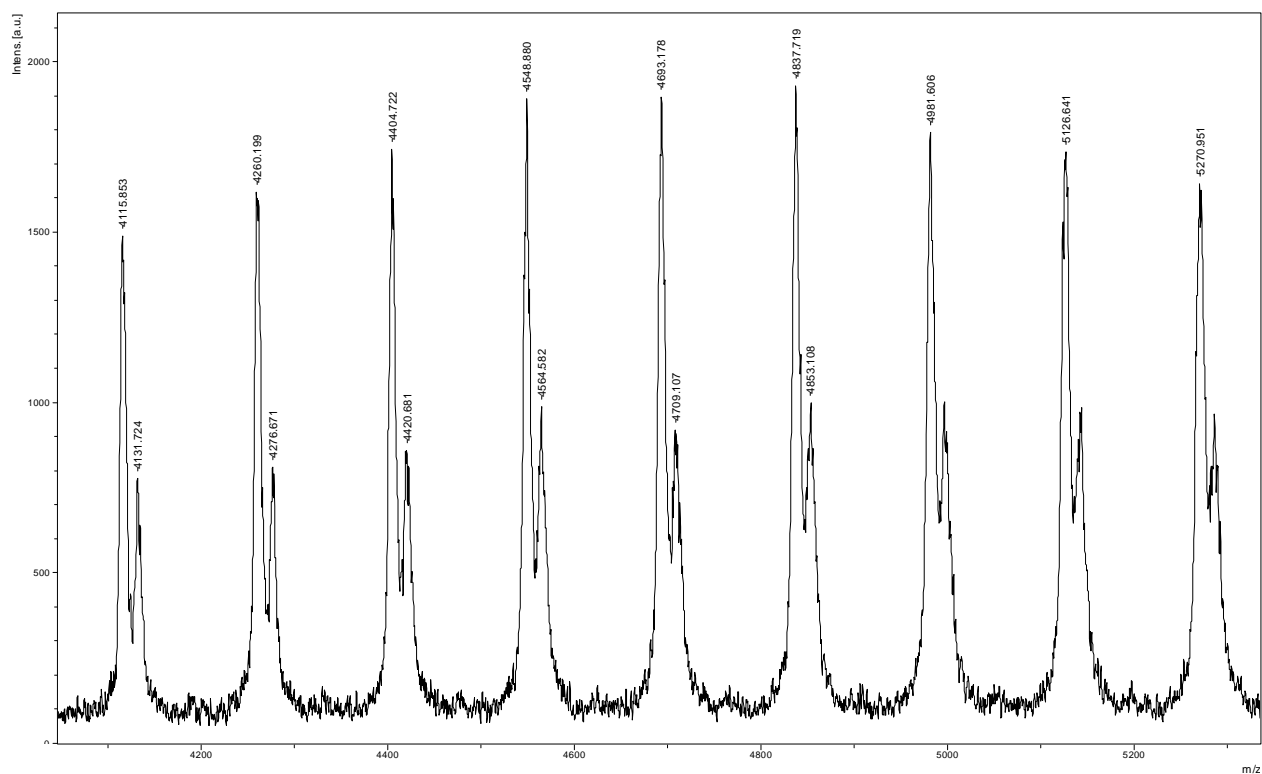

**Figure S5:** MALDI-TOF mass spectrum (main population: Na<sup>+</sup>; minor population: K<sup>+</sup>) of a low molecular weight PLLA having a number average molecular weight  $\overline{Mn}_{SEC}$  of 4 700 g·mol<sup>-1</sup>, prepared with L-LA/3<sup>i</sup>PrOH in relative amounts of 1 000/1/10 (20% conversion).
